# Supplementary material for: HIV-1 cellular and tissue replication patterns in infected humanized mice
Source: PubMed Central journal article supplement (PMC4800734; doi:10.1038/srep23513), 2016-03-21
Supplement: srep23513-s1.pdf [file srep23513-s1.pdf]

# ***HIV-1 cellular and tissue replication patterns in infected humanized mice***

Mariluz Araínga, Hang Su, Larisa Poluektova, Santhi Gorantla and Howard E. Gendelman

## **Supplementary Information**

Supplementary Table 1. Oligonucleotide primers and probes

| <b>Assay</b>       | <b>Genomic region</b>    | <b>Type (a)</b>          | <b>Sequence (5' – 3')</b>             |
|--------------------|--------------------------|--------------------------|---------------------------------------|
| Viral DNA<br>usRNA | <i>gag</i>               | Sense <sup>1-2</sup>     | TCAGCCCAGAAGTAATACCCATGT              |
|                    |                          | Antisense <sup>1</sup>   | TGCTATGTCAGTCCCCTTGGTTCTCT            |
|                    |                          | Antisense <sup>2</sup>   | CACTGTGTTTAGCATGGTGTTT                |
|                    |                          | Probe                    | FAM-ATTATCAGAAGGAGCCACCCCACAAGA-TAMRA |
| Integrated<br>DNA  | <i>alu</i><br><i>gag</i> | Sense                    | GCCTCCCAAAGTGCTGGGATTACA              |
|                    |                          | Antisense                | GTCCTGC TATGTCACTCC                   |
| msRNA              | <i>tat/rev</i>           | Sense <sup>1</sup>       | CTTAGGCATCTCCTATGGCAGGAA              |
|                    |                          | Antisense <sup>1-2</sup> | GGATCTGTCTCTGTCTCTCTCCACC             |
|                    |                          | Sense <sup>2</sup>       | ACAGTCAGACTCATCAAGTTTCTCTATCAAAGCA    |
|                    |                          | Probe                    | FAM-TTCCTTCGGGCCTGTCTGGGTCCC-TAMRA    |

(a) 1, used for first PCR; 2, for second (real time) PCR

Supplementary Table 2. Plasma Viral Load (PVL) of HIV-1 infected humanized mice

| <b>Weeks p.i.</b> | <b>Animal ID</b> | <b>PVL (mL)</b> | <b>copies/mL</b> | <b>CD4 T cell (%)</b> |
|-------------------|------------------|-----------------|------------------|-----------------------|
| 5                 | 219              | 230000          | 2.30E+05         | 20.90                 |
| 5                 | 221              | 9150            | 9.15E+03         | 17.10                 |
| 5                 | 222              | 1000            | 1.00E+03         | 36.70                 |
| 5                 | 2042             | 286696          | 2.87E+05         | 62.00                 |
| 5                 | 2045             | 1411            | 1.41E+03         | 67.40                 |
| 5                 | 2047             | 1271455         | 1.27E+06         | 69.00                 |
| 5                 | 2048             | 7635            | 7.64E+03         | 83.00                 |
| 5                 | 2049             | 1043000         | 1.04E+06         | 80.10                 |
| 5                 | 2050             | 38587           | 3.86E+04         | 65.80                 |
| 5                 | 842+             | 18900           | 1.89E+04         | 73.90                 |
| 5                 | 844+             | 2050000         | 2.05E+06         | 26.30                 |
| 11                | 2226             | 13650           | 1.37E+04         | 37.20                 |
| 11                | 2228             | 16475           | 1.65E+04         | 73.30                 |
| 11                | 2205             | 2230000         | 2.23E+06         | 24.30                 |
| 11                | 2214             | 1722500         | 1.72E+06         | 21.40                 |
| 11                | 2215             | 1715000         | 1.72E+06         | 17.40                 |
| 11                | 2216             | 70250           | 7.03E+04         | 53.10                 |
| 11                | 2221             | 967500          | 9.68E+05         | 3.16                  |
| 11                | 2234             | 1392500         | 1.39E+06         | 37.70                 |
| 11                | 2236             | 562500          | 5.63E+05         | 22.60                 |
| 11                | 2237             | 226500          | 2.27E+05         | 8.41                  |
| 11                | 2244             | 5050000         | 5.05E+06         | 52.10                 |
| 11                | 2245             | 1105000         | 1.11E+06         | 13.90                 |
| 14                | 1924             | 377000          | 3.77E+05         | 18.10                 |
| 14                | 1931             | 770000          | 7.70E+05         | 29.50                 |
| 14                | 1932             | 955000          | 9.55E+05         | 23.60                 |
| 14                | 1933             | 367000          | 3.67E+05         | 74.40                 |
